# Supplementary material
Source: PubMed Central journal article supplement (PMC5040625)
Supplement: NIHMS816111-supplement-01.pdf [file NIHMS816111-supplement-01.pdf]

## Supporting Information

Supporting Information is provided with this submission.

### Supporting Figure S1

For constant applied RF excitation field  $B_1$  with no  $R_1$  relaxation or off-resonance,  $R_2$  determines the excitation dynamic for any pulse duration  $p$  or nominal excitation angle  $\alpha = \gamma B_1 p$ . The effect varies over the range of relative  $R_2$  (thick lines). To achieve any particular  $\alpha < 2\pi$ , the rotation is truncated at the appropriate  $p$  (blue  $\rightarrow$  yellow gradient). For magnetization across the range of  $R_2$ , the final orientations (dashed lines tracing the range over  $R_2$ ) can differ greatly from the nominal excitation angle (dotted lines).

### Supporting Figure S2

The trace of angles from  $0^\circ$  to  $90^\circ$  can be used to compute efficiency of a hard pulse excitation for any  $T_2$  and nominal excitation angle  $\alpha$ . Excitation efficiency is  $M_{xy}/\sin(\alpha)$  for  $M_{xy}$  immediately following the excitation.

### Supporting Figure S3

The trace of angles from  $0^\circ$  to  $90^\circ$  can be used to chart efficiency of a hard pulse saturation for any  $T_2$  and nominal saturation angle  $\alpha$ . Saturation efficiency is  $M_{xy}/(1 - \cos(\alpha))$  for  $M_{xy}$  immediately following the saturation.

## Supporting Figure S4

The trace of angles from  $90^\circ$  to  $180^\circ$  can be used to compute effectiveness of a hard pulse inversion for any  $T_2$  and nominal inversion angle  $\alpha$ . Inversion effectiveness is  $M_z / \cos(\alpha)$  for  $M_z$  immediately following the inversion.

**Supporting Information for *Improved Cortical Bone  
Specificity in UTE MR Imaging***

AUTHORS - Ethan M. Johnson, Urvi Vyas, Pejman Ghanouni, Kim Butts Pauly, John M.  
Pauly

Magnetic Resonance Systems Research Laboratory, Department of Electrical Engineering,  
Stanford University, Stanford, California.

*Address correspondence to:*

Ethan Johnson

Packard Electrical Engineering, Room 310

350 Serra Mall

Stanford, CA 94305-9510

TEL: (650) 725-7005

E-MAIL: ethanjohnson@stanford.edu

This work was supported by NIH P01 CA159992 and P41 EB015891 and by GE Medical  
Systems.

Approximate Word Count: 772

Submitted September 22, 2015, to *Magnetic Resonance in Medicine* as a Supporting Infor-  
mation for *Improved Cortical Bone Specificity in UTE MR Imaging*.

# Concurrent excitation and relaxation dynamics

During RF excitation by constant applied  $B_1$ , if there is no  $R_1$  relaxation or off-resonance, the ratio of  $R_2$  to  $R_2^{\text{crit}}$  or ‘relative  $R_2$ ’ determines the excitation dynamic. Tracing the nominal  $2\pi$  rotation induced by the field over a duration  $(\gamma B_1)^{-1} = 2T_2^{\text{crit}}$  fully illustrates the magnetization orientations (Sup. Fig. S1) effected by any pulse duration  $p$  or nominal excitation angle  $\alpha = \gamma B_1 p$ . Therefore this trace describes the effect of any hard pulse; the  $90^\circ$  rotation discussed in *Improved Cortical Bone Specificity in UTE MR Imaging* is a special case of such. Without incorporation of other considerations, such as off-resonance or spatial selectivity, but given a maximum- $B_1$  constraint, a hard pulse is the maximally-efficient excitation, *i.e.* it is the best-possible approximation to an ideal excitation.

## Excitations, saturations and inversions

The trace of excitation effects can be used to chart the efficacy of excitation, saturation and inversion hard pulses, which vary with  $T_2$  and nominal excitation angle  $\alpha$ . An ideal excitation tips magnetization to angle  $\alpha$  in the range of 0 to  $\pi/2$ , which creates transverse magnetization of  $\sin(\alpha)$ . The excitation efficiency of a real excitation is then  $M_{xy}/\sin(\alpha)$  for  $M_{xy}$  immediately following the excitation (Sup. Fig. S2). For example, a pair of excitations using  $14 \mu\text{T}$  and  $1.4 \mu\text{T}$  pulses for  $22.5^\circ$  tip angles might be used to target magnetization from collagen-bound water in compact bone, which is attributed a  $T_2$  of 0.4 ms. The pulses impose critical  $T_2$  rates of 0.84 ms and 8.4 ms; the targeted magnetization then has relative  $T_2$  of 0.48 and 0.05, and it is excited with efficiency of 87% and 35% under the excitations. If magnetization with  $T_2$  of 10 ms is also present, it will be excited with efficiencies of 99% and 95%. Therefore a difference image will give the targeted  $T_2$  an intensity weighting more than  $10\times$  that of the longer  $T_2$ .

Analogously, a saturation pulse is intended to diminish the  $M_z$  component of magne-

tization by tipping the magnetization to angle  $\alpha$  in the range of 0 to  $\pi/2$ , which ideally leaves a longitudinal component of  $1 - \cos(\alpha)$ . Therefore the saturation efficiency of a real saturation pulse is  $(1 - M_z)/(1 - \cos(\alpha))$  for  $M_z$  immediately following the saturation (Sup. Fig. S3). This can be used, for example, to specify parameters for a simple rectangular long- $T_2$  suppression pulse, as well as to delineate its fundamental performance limits. To suppress longer- $T_2$  magnetization while retaining that with shorter- $T_2$ , high and low efficiencies would be desired at the longer and shorter  $T_2$  values respectively. For 10 ms and 0.4 ms  $T_2$  magnetizations, the  $B_1$  amplitude and tip angle can be chosen by centering the 1.4 decade difference in relative  $T_2$  over the steepest change in efficiency. On this principle,  $B_1$  should be set to place the longer  $T_2$  just below the critical threshold and a tip angle near  $90^\circ$  should be used. With a  $1.07 \mu\text{T}$ ,  $85^\circ$  saturation pulse applied, the remaining normalised  $M_z$  for the short- $T_2$  component will be 0.632 greater than that of the long- $T_2$  component. This can additionally be used to facilitate accurate  $T_1$  mapping for short- $T_2$  components by saturation-recovery-type methods, as estimation of  $T_1$  is premised upon knowledge of the  $M_z$  remaining after the interrogation pulse.

Finally, an inversion ideally flips magnetization to an angle  $\alpha$  in the range of  $\pi/2$  to  $\pi$  so that its polarity is negated. The effectiveness of an inversion is  $M_z/\cos(\alpha)$  for  $M_z$  immediately following the inversion (Sup. Fig. S4), which is 1 when maximally effective or is negative when ineffective. Analysis of contrast in pulse sequences that apply inversion pulses with short- $T_2$  magnetization present depends upon characterization of the influence that an inversion pulse has upon the short- $T_2$  components. In such analysis, the  $\cos(\alpha)$  term that typically characterises inversion effects must be scaled by the efficacy to accurately represent  $M_z$ . For instance, a sequence that applies an inversion pulse and then performs one or more excitations and encodes will have some  $T_2$ -dependence in its  $T_1$  contrast. Setting sequence parameters such as inversion time or flip angle to exploit the dependence necessitates incorporation of the inversion effectiveness. Following a  $180^\circ$  inversion pulse using  $B_1$  of  $20 \mu\text{T}$ , magnetization with  $T_2$  of 0.4 ms, a relative  $T_2$  of 0.7, is actually inverted with effectiveness of 0.46, which is much greater than 0, which might otherwise be assumed for a short  $T_2$ .

As a consequence, if choosing parameters under an assumption of no inversion for short- $T_2$  components, an inversion time may be chosen that unintentionally nulls the component of interest!

## List of Figures

|    |                                                                               |   |
|----|-------------------------------------------------------------------------------|---|
| S1 | Excitation dynamics with significant $T_2$ and negligible $T_1$ . . . . .     | 5 |
| S2 | Excitation efficiency with significant $T_2$ and negligible $T_1$ . . . . .   | 6 |
| S3 | Saturation efficiency with significant $T_2$ and negligible $T_1$ . . . . .   | 7 |
| S4 | Inversion effectiveness with significant $T_2$ and negligible $T_1$ . . . . . | 8 |

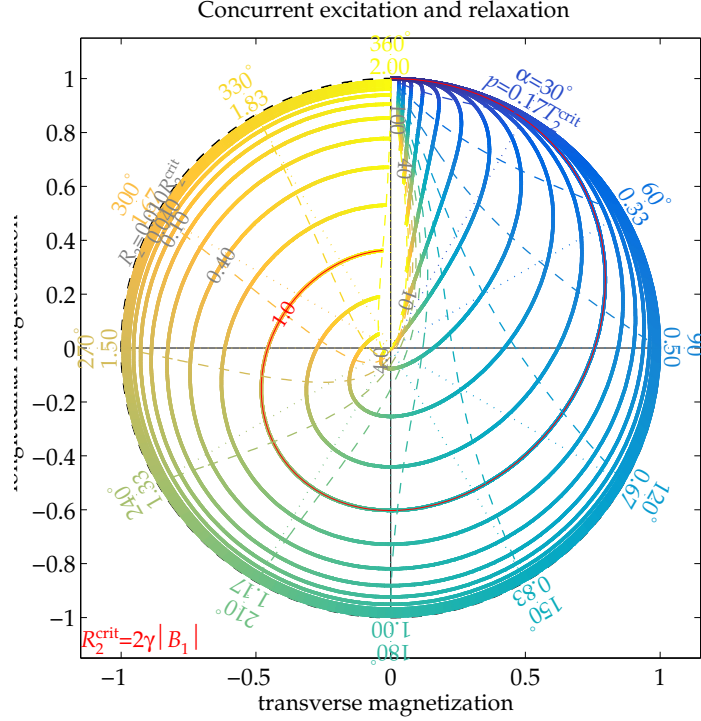

Supporting Figure S1: For constant applied RF excitation field  $B_1$  with no  $R_1$  relaxation or off-resonance,  $R_2$  determines the excitation dynamic for any pulse duration  $p$  or nominal excitation angle  $\alpha = \gamma B_1 p$ . The effect varies over the range of relative  $R_2$  (thick lines). To achieve any particular  $\alpha < 2\pi$ , the rotation is truncated at the appropriate  $p$  (blue  $\rightarrow$  yellow gradient). For magnetization across the range of  $R_2$ , the final orientations (dashed lines tracing the range over  $R_2$ ) can differ greatly from the nominal excitation angle (dotted lines).



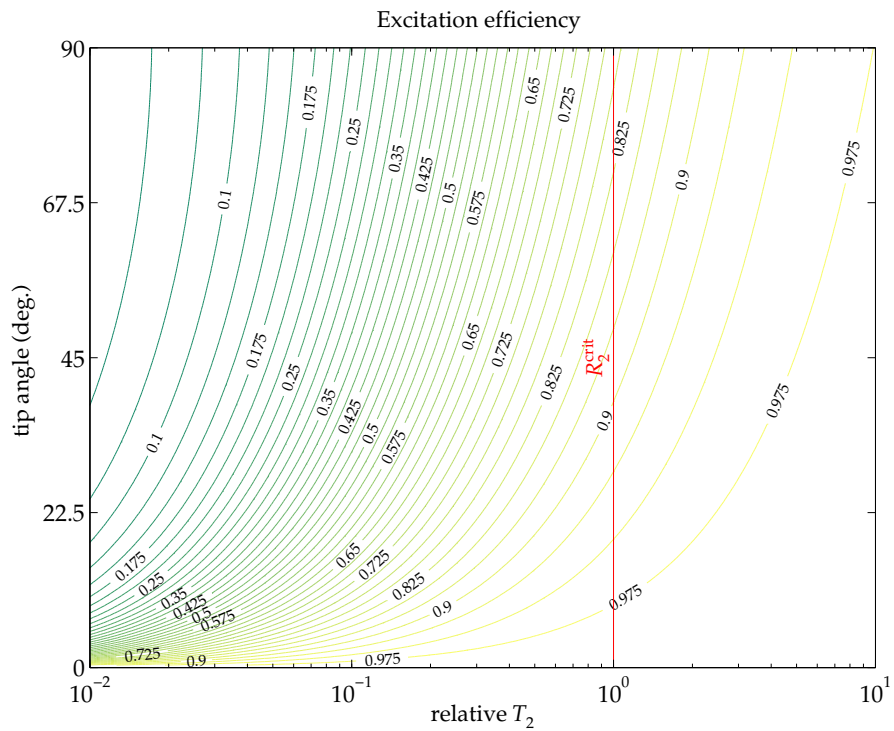

Supporting Figure S2: The trace of angles from  $0^\circ$  to  $90^\circ$  can be used to compute efficiency of a hard pulse excitation for any  $T_2$  and nominal excitation angle  $\alpha$ . Excitation efficiency is  $M_{xy}/\sin(\alpha)$  for  $M_{xy}$  immediately following the excitation.

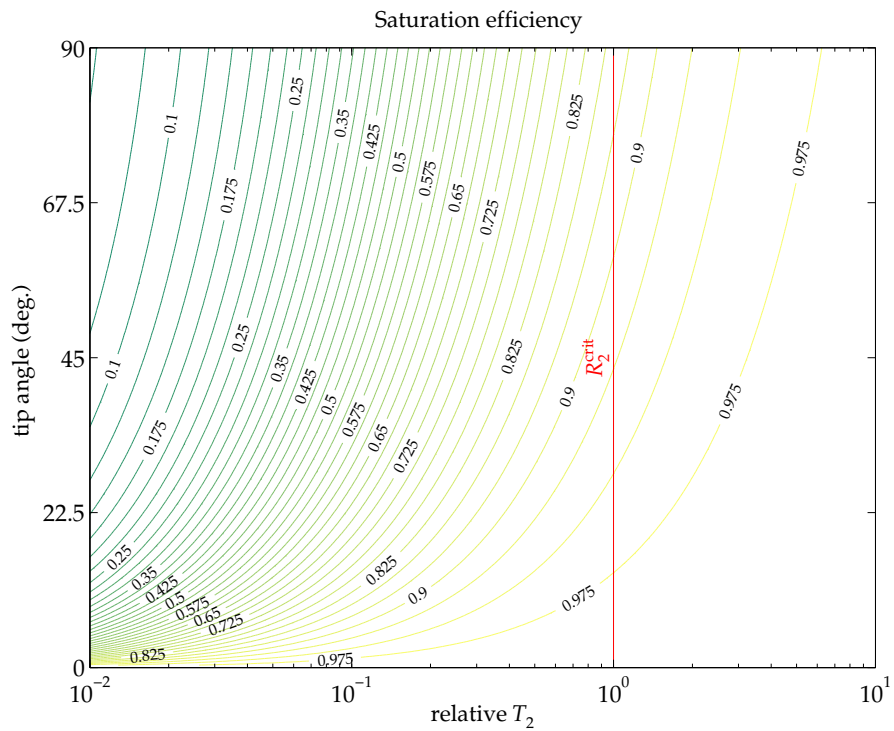

Supporting Figure S3: The trace of angles from  $0^\circ$  to  $90^\circ$  can be used to chart efficiency of a hard pulse saturation for any  $T_2$  and nominal saturation angle  $\alpha$ . Saturation efficiency is  $M_{xy}/(1 - \cos(\alpha))$  for  $M_{xy}$  immediately following the saturation.

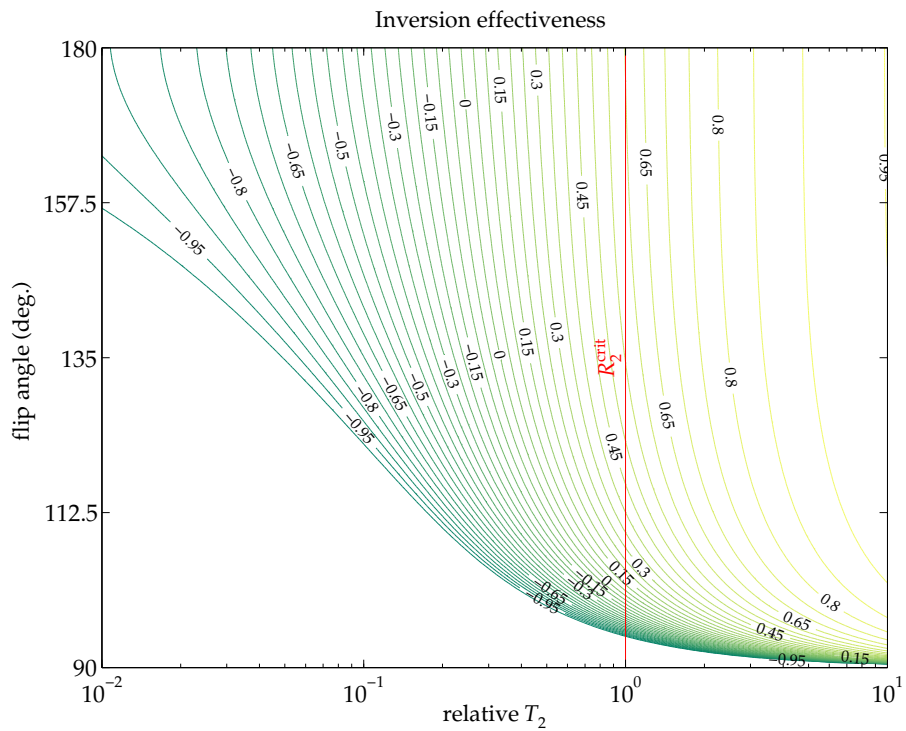

Supporting Figure S4: The trace of angles from  $90^\circ$  to  $180^\circ$  can be used to compute effectiveness of a hard pulse inversion for any  $T_2$  and nominal inversion angle  $\alpha$ . Inversion effectiveness is  $M_z / \cos(\alpha)$  for  $M_z$  immediately following the inversion.
